# Supplementary material
Source: PubMed Central journal article supplement (PMC9633376)
Supplement: NIHMS1836889-supplement-1.pdf [file NIHMS1836889-supplement-1.pdf]

## Supporting Information

**Nanoparticle-Based Follistatin Messenger RNA Therapy for Reprogramming Metastatic Ovarian Cancer and Ameliorating Cancer-Associated Cachexia**

Tetiana Korzun, Abraham S. Moses, Jeonghwan Kim, Siddharth Patel, Canan Schumann, Peter R. Levasseur, Parham Diba, Brennan Olson, Katia Graziella De Oliveira Rebola, Mason Norgard, Youngrong Park, Ananiya A. Demessie, Yulia Eygeris, Subisha Sundaram, Vladislav Grigoriev, Tanja Pejovic, Jonathan R. Brody, Olena R. Taratula, Xinxia Zhu, Gaurav Sahay, Daniel L. Marks\*, Oleh Taratula\*

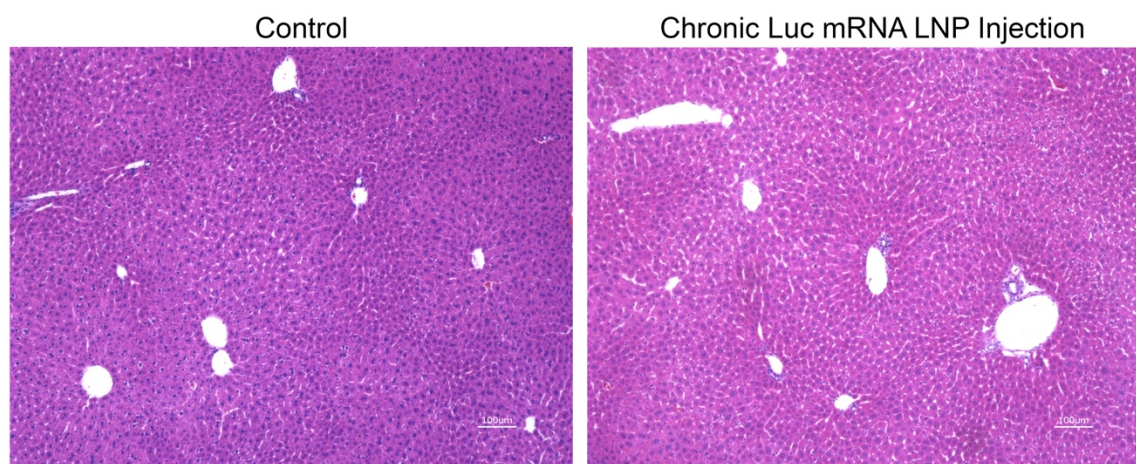

**Figure S1:** Representative histopathological examination of murine liver sections after chronic injection of Luc mRNA LNPs.

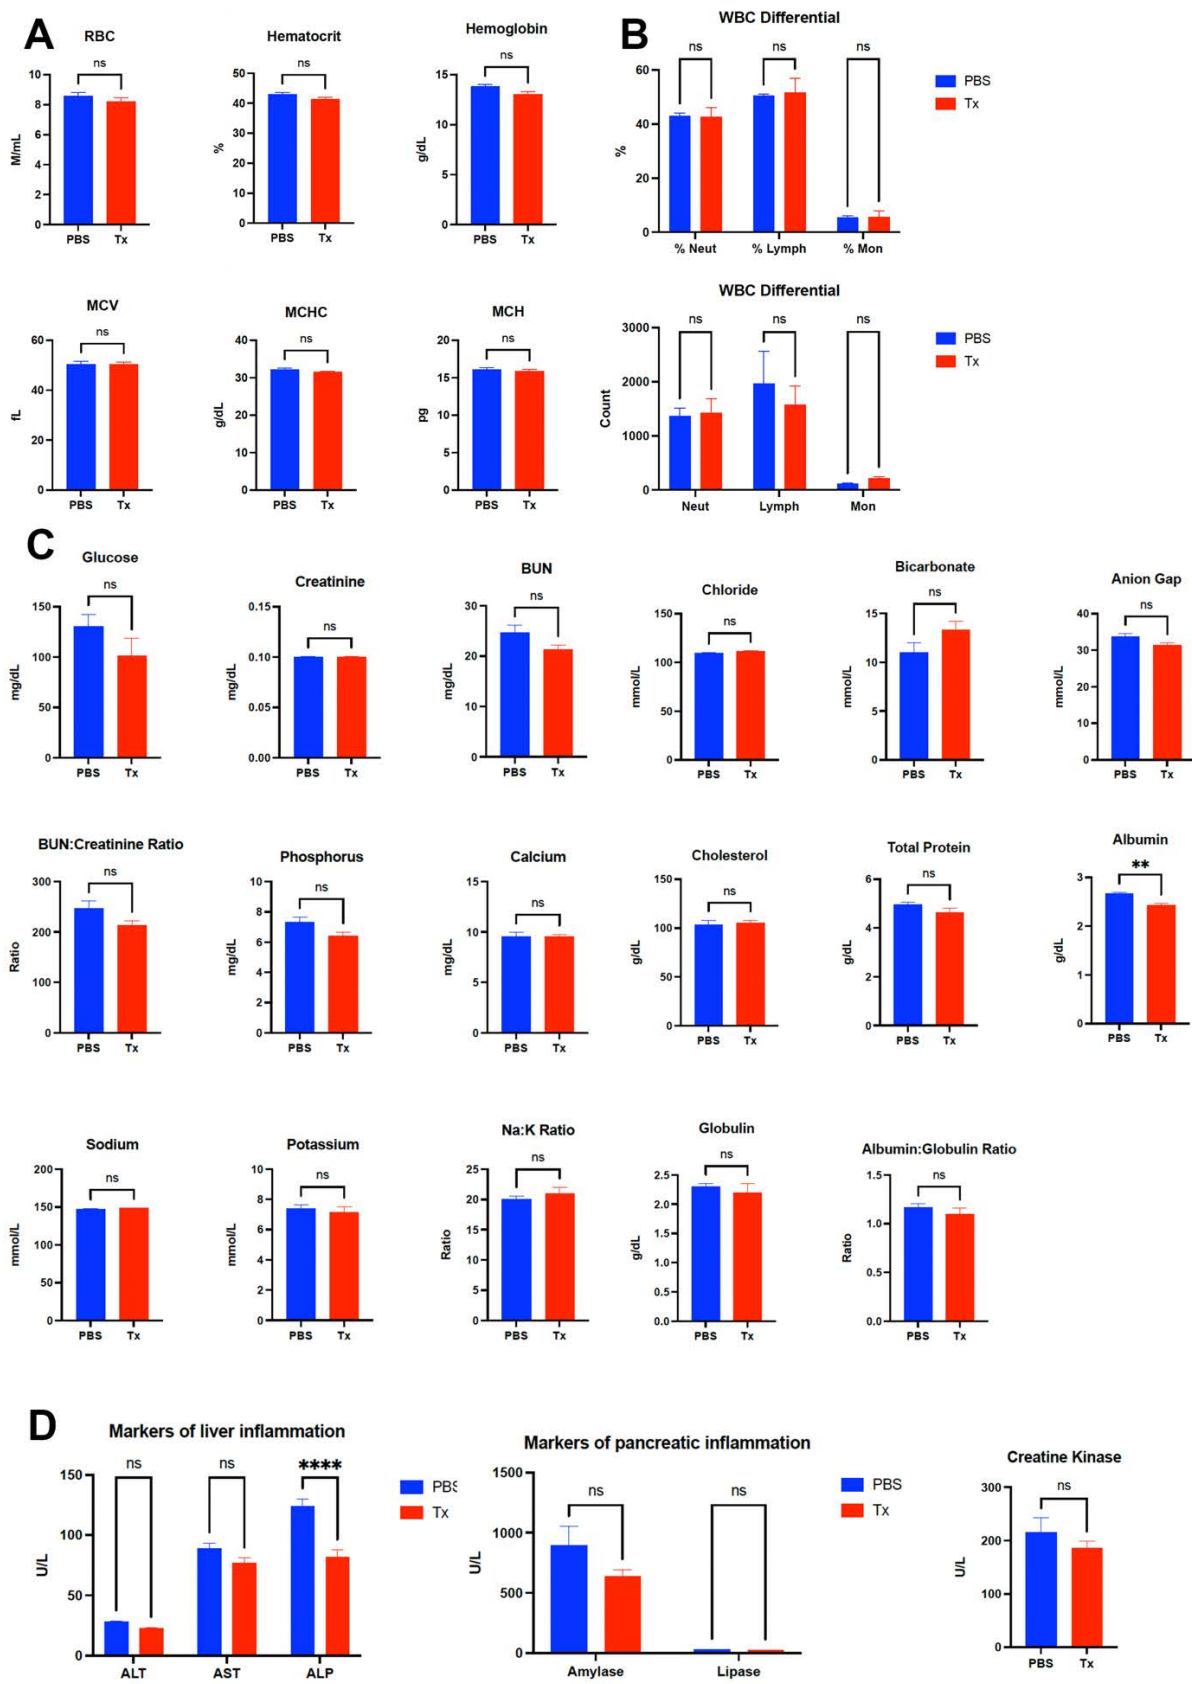

**Figure S2:** Blood analysis for evaluation of systemic toxicity of chronically injected Luc mRNA LNPs. (A) erythrocytes and (B) leukocytes evaluation; (C) blood chemistry; (D) markers of liver and pancreatic inflammation.

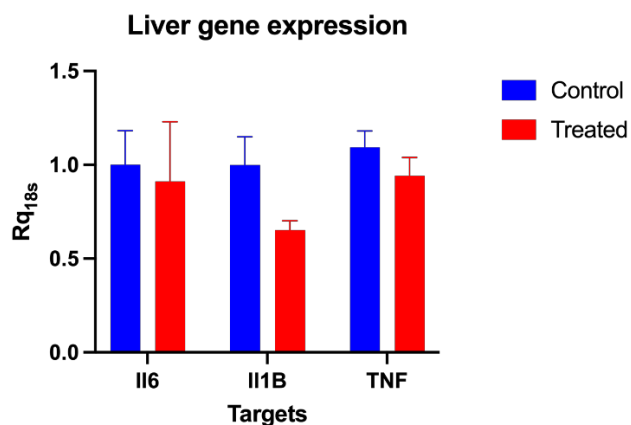

**Figure S3:** Expression of hepatic inflammatory phase reactants in mice receiving 3 daily injections of *Luc* mRNA LNPs.

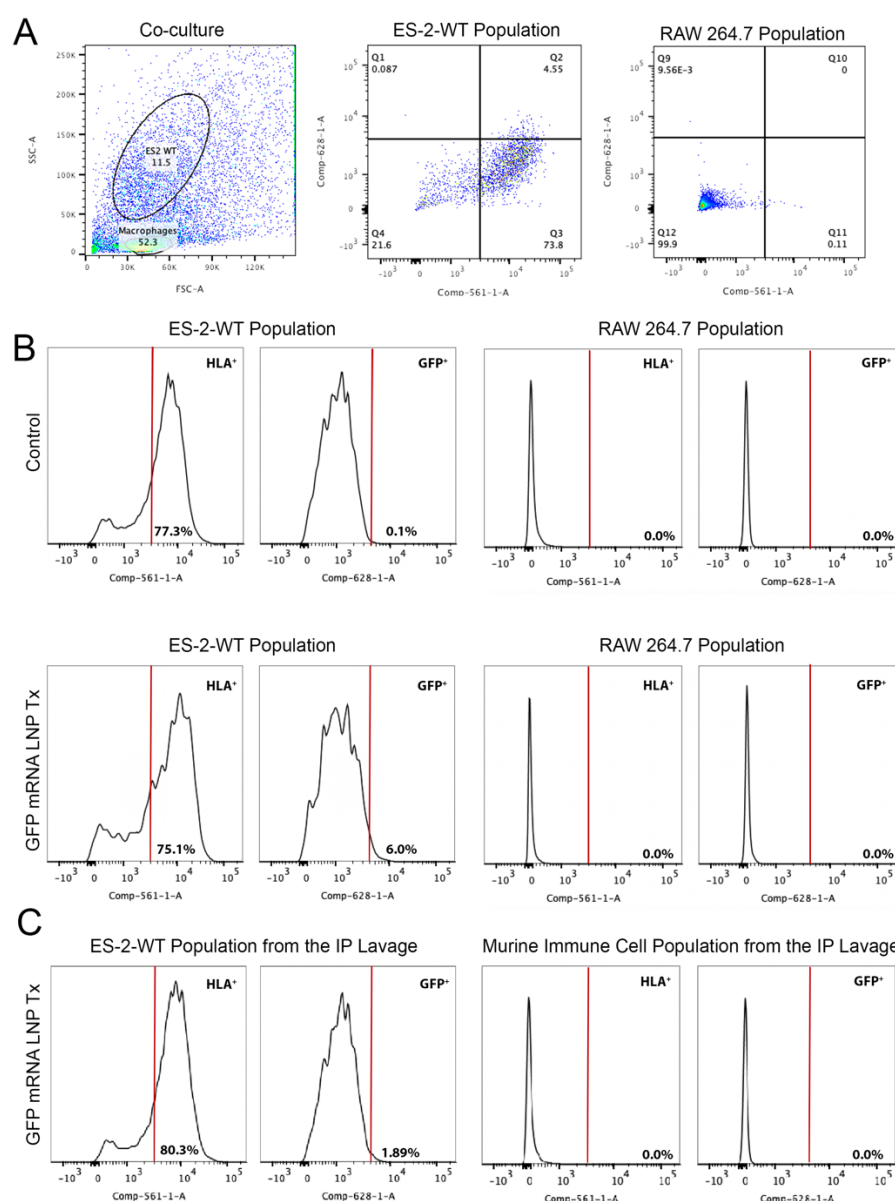

**Figure S4:** Proportion and type of cells internalizing GFP mRNA LNPs and expressing GFP. (A) Flow cytometry analysis and gating approach in evaluating in vitro and ex vivo samples, Comp – 561- 1 - A – anti-HLA-ABC antibody; Comp -628 – 1 - A – anti-GFP antibody. (B)

Analysis of in vitro subculture of ES-2-WT and Raw 264.7 cells (3:1), where controls were treated with PBS and GFP mRNA LNP Tx samples were treated with GFP mRNA LNP formulation. (C) ES-2-WT-bearing mice were treated with GFP mRNA LNPs (2ug mRNA per mouse), control mice were injected with PBS. Collected IP lavage fluid containing mixture of ES-2-WT cells and murine immune cells was subjected to flow cytometry analysis.

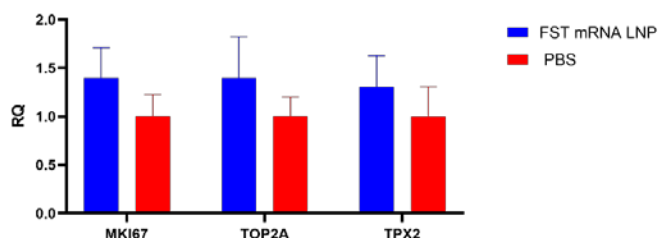

**Figure S5:** Proliferation markers in ES-2 cell clusters from treatment and control groups.

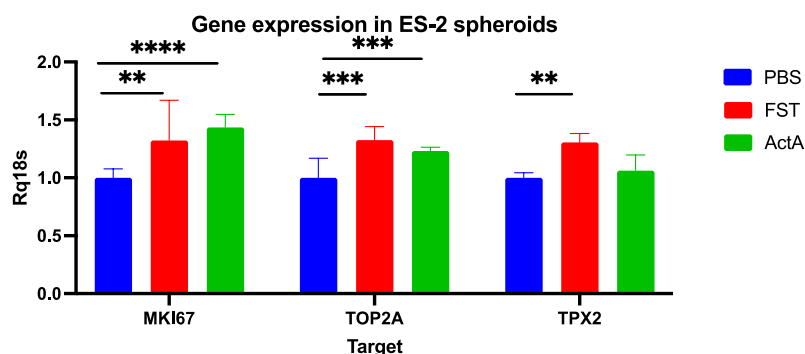

**Figure S6:** In vitro evaluation of gene expression from ES-2-WT spheroids.

**TGF-B family proteins concentration in IP lavage**

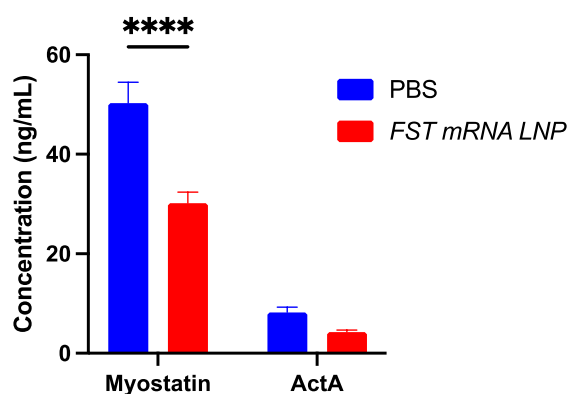

**Figure S7:** Myostatin and ActA concentration in ES-2-WT malignant ascites from peritoneal cavity collected from control and FST mRNA LNP-treated mice.

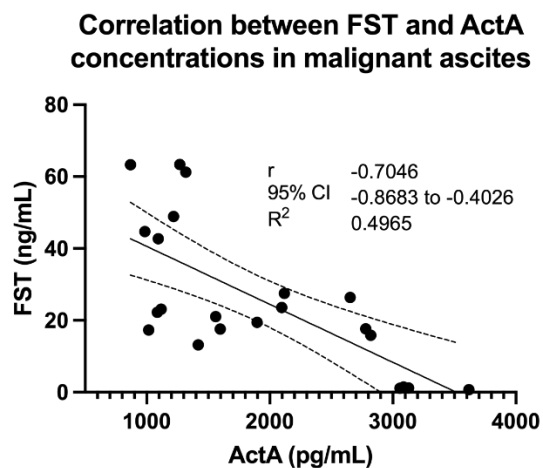

**Figure S8:** Correlation between FST and ActA concentrations from pooled samples of healthy and ES-2-WT-bearing mice, as well as mice treated with FST mRNA LNP formulation.

**Table S1:** Dynamic Light Scattering Properties of Assembled mRNA LNP platforms

| LNP                      | Dynamic Light Scattering |       |              |
|--------------------------|--------------------------|-------|--------------|
|                          | $d$ (nm)                 | $PDI$ | $\zeta$ (mV) |
| <i>Luc</i> mRNA LNP      | 84.15                    | 0.148 | 9.07         |
| <i>EGFP</i> mRNA LNP     | 102.00                   | 0.207 | -2.38        |
| <i>FST</i> mRNA LNP      | 84.57                    | 0.065 | -7.78        |
| <i>EGFP/FST</i> mRNA LNP | 86.55                    | 0.217 | 3.04         |
| Empty LNP                | 72.22                    | 0.116 | 1.55         |

**Table S2:** Estimated mean survival for evaluation of combinatorial treatment with CDDP and FST or *FST* mRNA LNPs

| Treatment Group           | Mean Survival | Std. Error | 95% LCL | 95% UCL |
|---------------------------|---------------|------------|---------|---------|
| PBS                       | 12.2          | 1.16       | 9.93    | 14.47   |
| CDDP                      | 21.2          | 1.66       | 17.96   | 24.44   |
| FST <sub>H</sub>          | 17.0          | 1.34       | 14.37   | 19.63   |
| CDDP+FST <sub>H</sub>     | 23.8          | 1.96       | 19.96   | 27.64   |
| <i>FST</i> mRNA LNP       | 25.8          | 2.80       | 20.31   | 31.29   |
| CDDP+ <i>FST</i> mRNA LNP | 33.8          | 2.35       | 29.19   | 38.41   |

**Table S3: mRNA ORF sequences**

| <i>FST</i> mRNA ORF (CleanCap®)                                                                                                                                                                                                                                                                                                                                                                                                                                                                                                                                                                                                                                                                                                                                                                                                                                                                                                                                                                                                                                                                                                                                                                                                                                                                                                                                                                                                                                                                                                                                                                                                              |
|----------------------------------------------------------------------------------------------------------------------------------------------------------------------------------------------------------------------------------------------------------------------------------------------------------------------------------------------------------------------------------------------------------------------------------------------------------------------------------------------------------------------------------------------------------------------------------------------------------------------------------------------------------------------------------------------------------------------------------------------------------------------------------------------------------------------------------------------------------------------------------------------------------------------------------------------------------------------------------------------------------------------------------------------------------------------------------------------------------------------------------------------------------------------------------------------------------------------------------------------------------------------------------------------------------------------------------------------------------------------------------------------------------------------------------------------------------------------------------------------------------------------------------------------------------------------------------------------------------------------------------------------|
| ATGGTCCGCGCGAGGCACCAGCCGGGTGGGCTTTGCCTCCTGCTGCTGCTGCTCT<br>GCCAGTTCATGGAGGACCGCAGTGCCAGGCTGGGAACTGCTGGCTCCGTCAAGC<br>GAAGAACGGCCGCTGCCAGGTCCTGTACAAGACCGAACTGAGCAAGGAGGAGTG<br>CTGCAGCACCGCCGGCTGAGCACCTCGTGGACCGAGGAGGACGTGAATGACAA<br>CACTCTTCAAGTGGATGATTTTCAACGGGGGCGCCCCAACTGCATCCCCTGT<br>AAAGAAACGTGTGAGAACGTGGACTGTGGACCTGGGAAAAAATGCCGAATGAAC<br>AAGAAGAACAAACCCCGCTGCGTCTGCGCCCCGGATTGTTCCAACATCACCTGGA<br>AGGGTCCAGTCTGCGGGCTGGATGGGAAAACCTACCGCAATGAATGTGCACTCCT<br>AAAGGCAAGATGTAAAGAGCAGCCAGAACTGGAAGTCCAGTACCAAGGCAGATG<br>TAAAAGACTTGTGCGGGATGTTTTCTGTCCAGGCAGCTCCACATGTGTGGTGGAC<br>CAGACCAATAATGCCTACTGTGTGACCTGTAATCGGATTTGCCAGAGCCTGCTT<br>CCTCTGAGCAATATCTCTGTGGGAATGATGGAGTCACCTACTCCAGTGCCTGCCA<br>CCTGAGAAAGGCTACCTGCCTGCTGGGCAGATCTATTGGATTAGCCTATGAGGGA<br>AAGTGTATCAAAGCAAAGTCCTGTGAAGATATCCAGTGCCTGGTGGGAAAAAA<br>TGTTTATGGGATTTCAAGGTTGGGAGAGGCCGGTGTTCCTCTGTGATGAGCTGT<br>GCCCTGACAGTAAGTCGGATGAGCCTGTCTGTGCCAGTGACAATGCCACTTATGC<br>CAGCGAGTGTGCCATGAAGGAAGCTGCCTGCTCCTCAGGTGTGCTACTGGAAGTA<br>AAGCACTCCGGATCTTGCAACTCCATTTGGAAGACACCGAGGAAGAGGAGGAA<br>GATGAAGACCAGGACTACAGCTTTCCTATATCTTCTATTCTAGAGTGGTAA                                                                                                                                                                                                                                                                                                                                                                                                                                                                                                   |
| <i>FLuc</i> mRNA ORF Sequence (CleanCap® FLuc mRNA, L-7202)                                                                                                                                                                                                                                                                                                                                                                                                                                                                                                                                                                                                                                                                                                                                                                                                                                                                                                                                                                                                                                                                                                                                                                                                                                                                                                                                                                                                                                                                                                                                                                                  |
| AUGGAGGACGCCAAGAACAUCAAGAAGGGCCCCGCCCCUUCUACCCCUUGGA<br>GGACGGCACCGCCGGCGAGCAGCUGCACAAGGCCAUGAAGCGGUACGCCUUG<br>UGCCCCGGCACCAUCGCCUUCACCGACGCCACAUCGAGGUGGACAUCACCUACG<br>CCGAGUACUUCGAGAUGAGCGUGCGGCUGGCCGAGGCCAUGAAGCGGUACGGC<br>CUGAACACCAACCACCGGAUCGUGGUGUGCAGCGAGAACAGCCUGCAGUUCU<br>CAUGCCCGUGCUGGGCGCCUGUUCACGGCGUGGCCCGUGGCCCCCGCCAACGA<br>CAUCUACAACGAGCGGGAGCUGCUGAACAGCAUAGGGCAUCAGCCAGCCACCG<br>UGGUGUUCGUGAGCAAGAAGGGCCUGCAGAAGAUCCUGAACGUGCAGAAGAAG<br>CUGCCCAUCAUCCAGAAGAUAUCAUCAUUGGACAGCAAGACCGACUACCAGGG<br>CUUCCAGAGCAUGUACACCUUCGUGACCAGCCACCUGCCCCCGGCUUCAACGA<br>GUACGACUUCGUGCCCGAGAGCUUCGACCGGGACAAGACCAUCGCCUUGAUC<br>UGAACAGCAGCGGCAGCACCGGCCUGCCCAAGGGCGUGGCCCGUGCCCCACCGGA<br>CCGCCUGCGUGCGGUUCAGCCACGCCCGGGACCCCAUCUUCGGCAACCAGAUA<br>UCCCCGACACCGCCAUCUGAGCGUGGUGCCCUUCCACCACGGCUUCGGCAUGU<br>UCACCACCCUGGGCUACCUGAUCUGCGGCUUCCGGGUGGUGCUGAUGUACCGG<br>UUCGAGGAGGAGCUGUUCUGCGGAGCCUGCAGGACUACAAGAUCCAGAGCGC<br>CCUGCUGGUGCCCACCCUGUUCAGCUUCUUCGCCAAGAGCACCCUGAUCGACA<br>AGUACGACCUGAGCAACCUGCACGAGAUCCGACGGCGGGCGCCCCUUGAGC<br>AAGGAGGUGGGCGAGGCCGUGGCCAAGCGGUUCCACCUGCCCGGCAUCCGGCA<br>GGGCUACGGCCUGACCGAGACCACCAGCGCCAUCUGAUCACCCCGAGGGCGA<br>CGACAAGCCCGGCGCCGUGGGCAAGGUGGUGCCCUUCUUCGAGGCCAAGGUGG<br>UGGACCUGGACACCGGCAAGACCCUGGGCGUGAACAGCGGGGCGAGCUGUGC<br>GUGCGGGGCCCAUGAUAUGAGCGGCUACGUGAACAAACCCCGAGGCCACCAA<br>CGCCUGAUCGACAAGGACGGCUGGCUACAGCGGGGACAUCGCCUACUGGG<br>ACGAGGACGAGCACUUCUUCUUCGUGGACCGGCUAAGAGCCUGAUAAGUAC<br>AAGGGCUACCAGGUGGCCCCCGCCGAGCUGGAGAGCAUCCUGCUGCAGCACCC<br>CAACAUCUUCGACCGCGGCGUGGCCGGCCUGCCCGACGACGACCGCGGCGAGCU<br>GCCCGCCCGGUGGUGGUGCUGGAGCACGGCAAGACCAUGACCGAGAAGGAGA |

UCGUGGACUACGUGGCCAGCCAGGUGACCACCGCCAAGAAGCUGCGGGGGCGGC  
GUGGUGUUCGUGGACGAGGUGCCCAAGGGCCUGACCGGCAAGCUGGACGCCC  
GAAGAUCCGGGAGAUCUGAUAAGGCCAAGAAGGGCGGCAAGAUCGCCGUGU  
GA

*EGFP* mRNA ORF Sequence (CleanCap® EGFP mRNA, L-7601)

AUGGUGAGCAAGGGCGAGGAGCUGUUCACCGGGGUGGUGCCCAUCCUGGUCGA  
GCUGGACGGCGACGUAAACGGCCACAAGUUCAGCGUGUCCGGCGAGGGCGAGG  
GCGAUGCCACCUACGGCAAGCUGACCCUGAAGUUCAUCUGCACCACCGGCAAG  
CUGCCCGUGCCCUGGCCACCCUCGUGACCACCCUGACCUACGGCGUGCAGUGC  
UUCAGCCGCUACCCCGACCACAUGAAGCAGCACGACUUCUUAAGUCCGCCAU  
GCCCGAAGGCUACGUCCAGGAGCGCACCAUCUUCUUAAGGACGACGGCAACU  
ACAAGACCCGCGCCGAGGUGAAGUUCGAGGGCGACACCCUGGUGAACCGCAUC  
GAGCUGAAGGGCAUCGACUUAAGGAGGACGGCAACAUCUGGGGCACAAGCU  
GGAGUACAACUACAACAGCCACAACGUCUAUAUCAUGGCCGACAAGCAGAAGA  
ACGGCAUCAAGGUGAACUUAAGAUCCGCCACAACAUCGAGGACGGCAGCGUG  
CAGCUCGCCGACCACUACCAGCAGAACACCCCAUCGGCGACGGCCCCGUGCUG  
CUGCCCGACAACCACUACCUGAGCACCCAGUCCGCCUGAGCAAAGACCCCAAC  
GAGAAGCGCGAUCACAUGGUCCUGCUGGAGUUCGUGACCGCCGCCGGGAUCAC  
UCUCGGCAUGGACGAGCUGUACAAGUAA
